# Supplementary material
Source: PubMed Central journal article supplement (PMC4388600)

# Figure S1

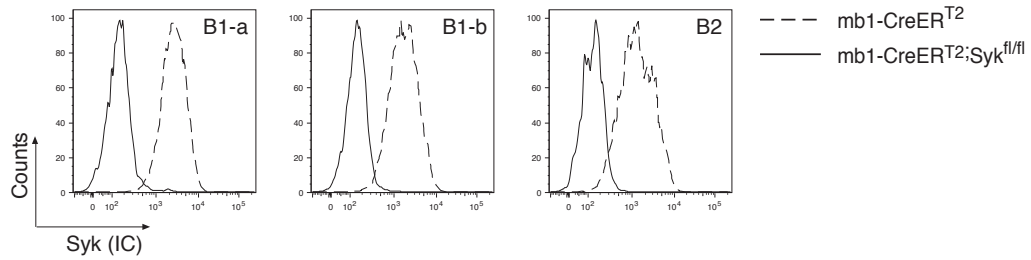

Figure S2

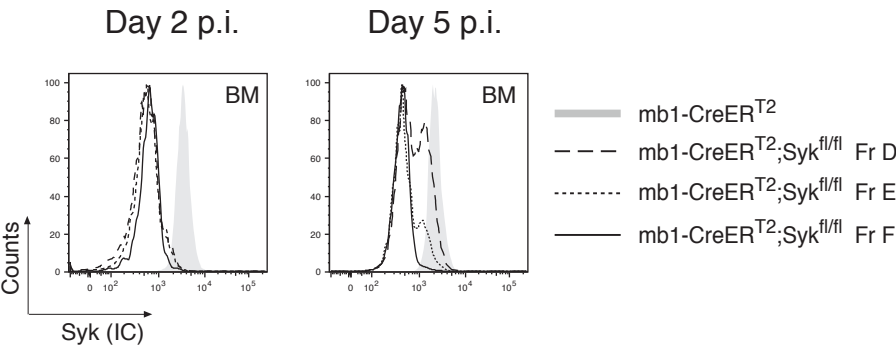

**Figure S3**

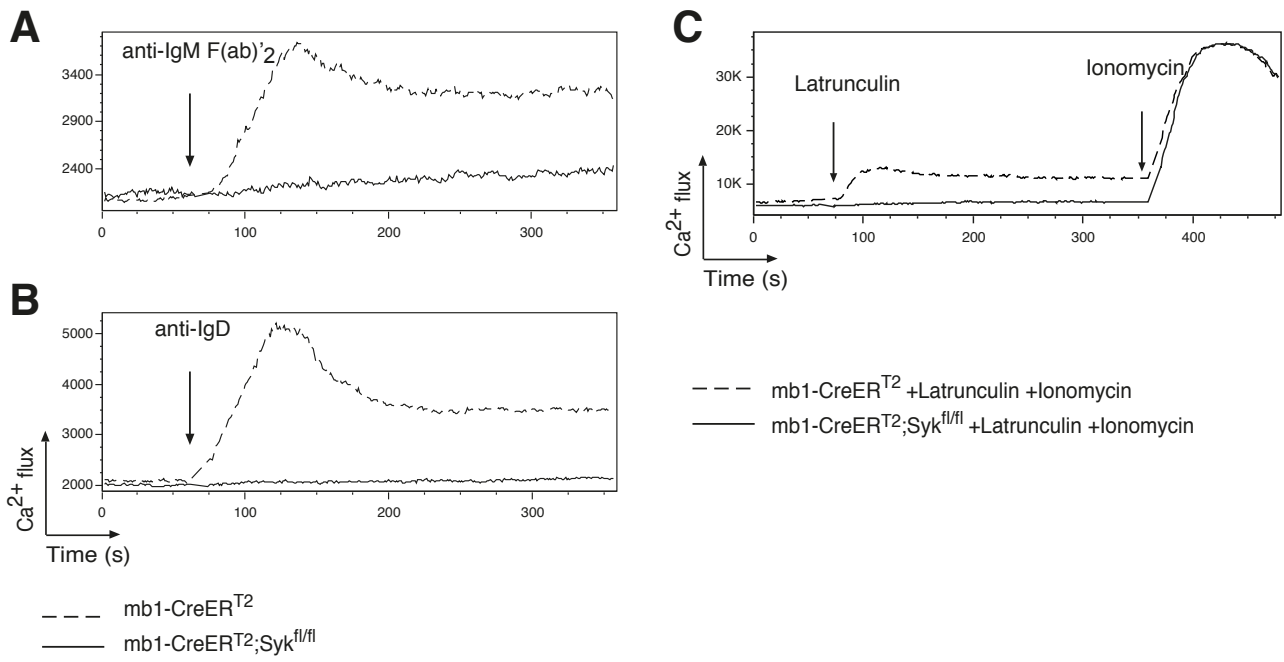

# Figure S4

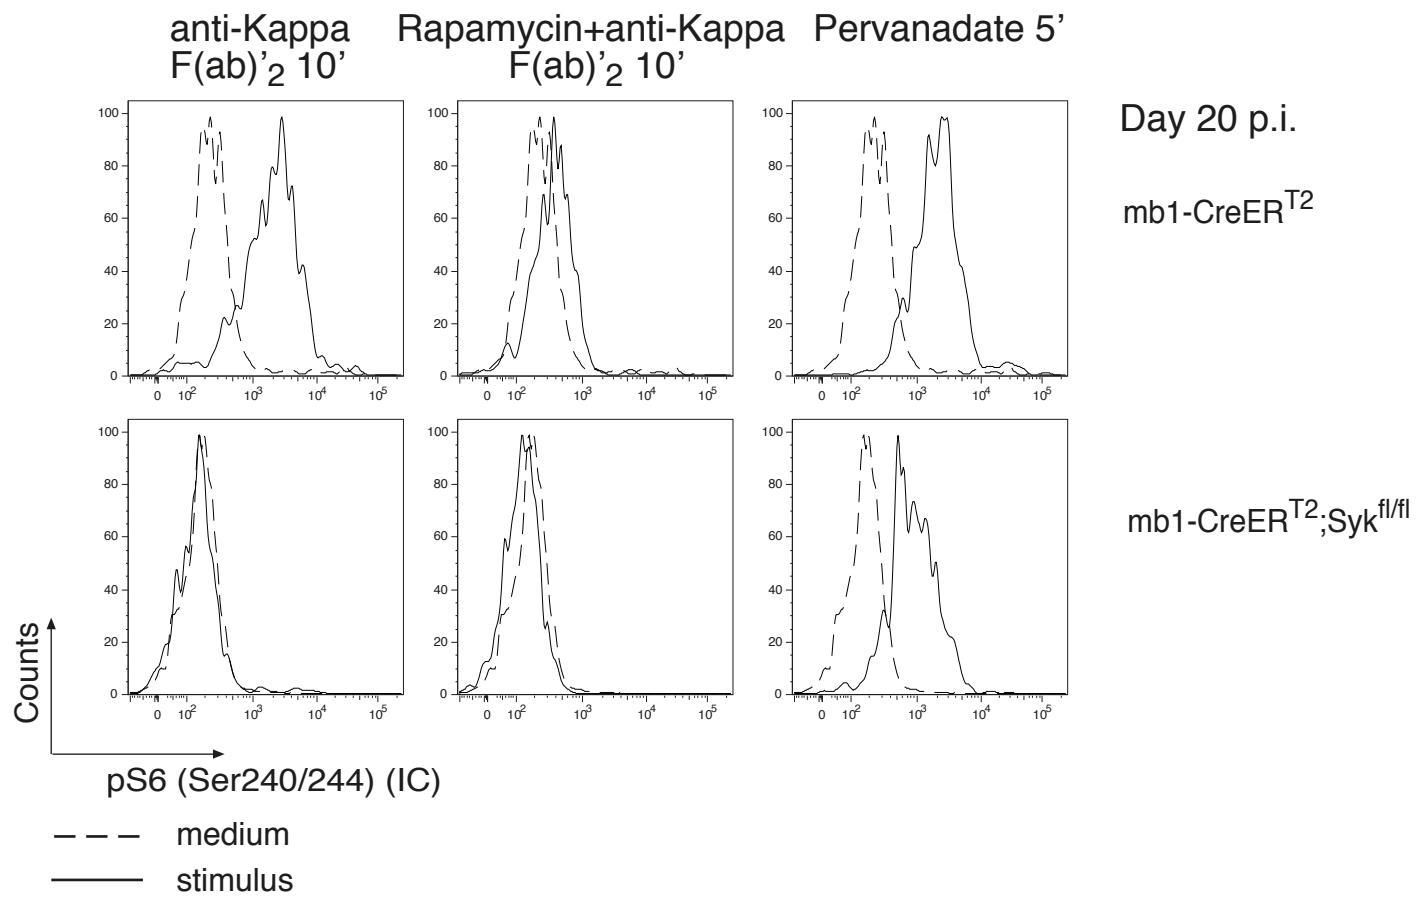

# Figure S5

## A

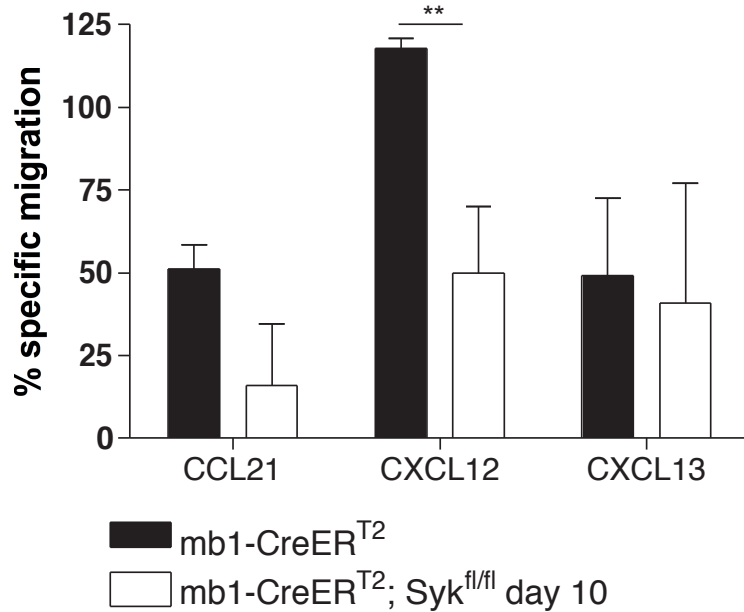

## B

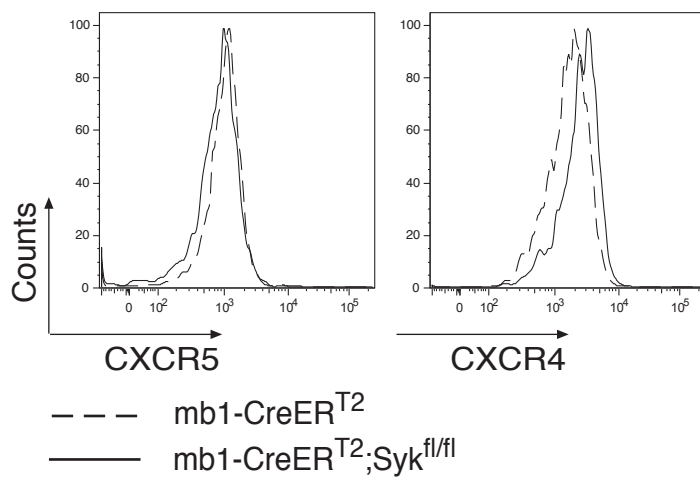

# Figure S6

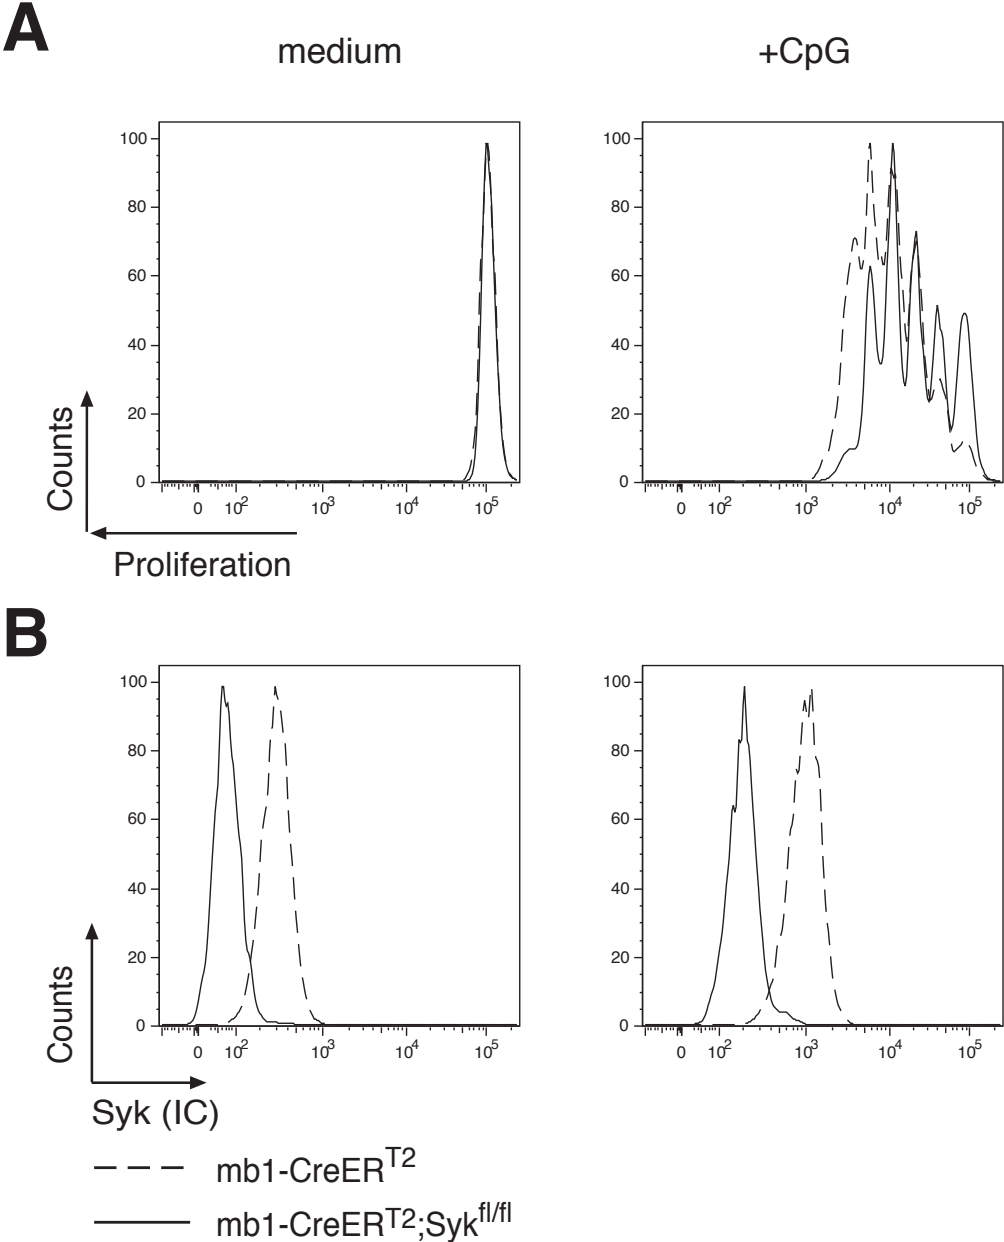

# Figure S7

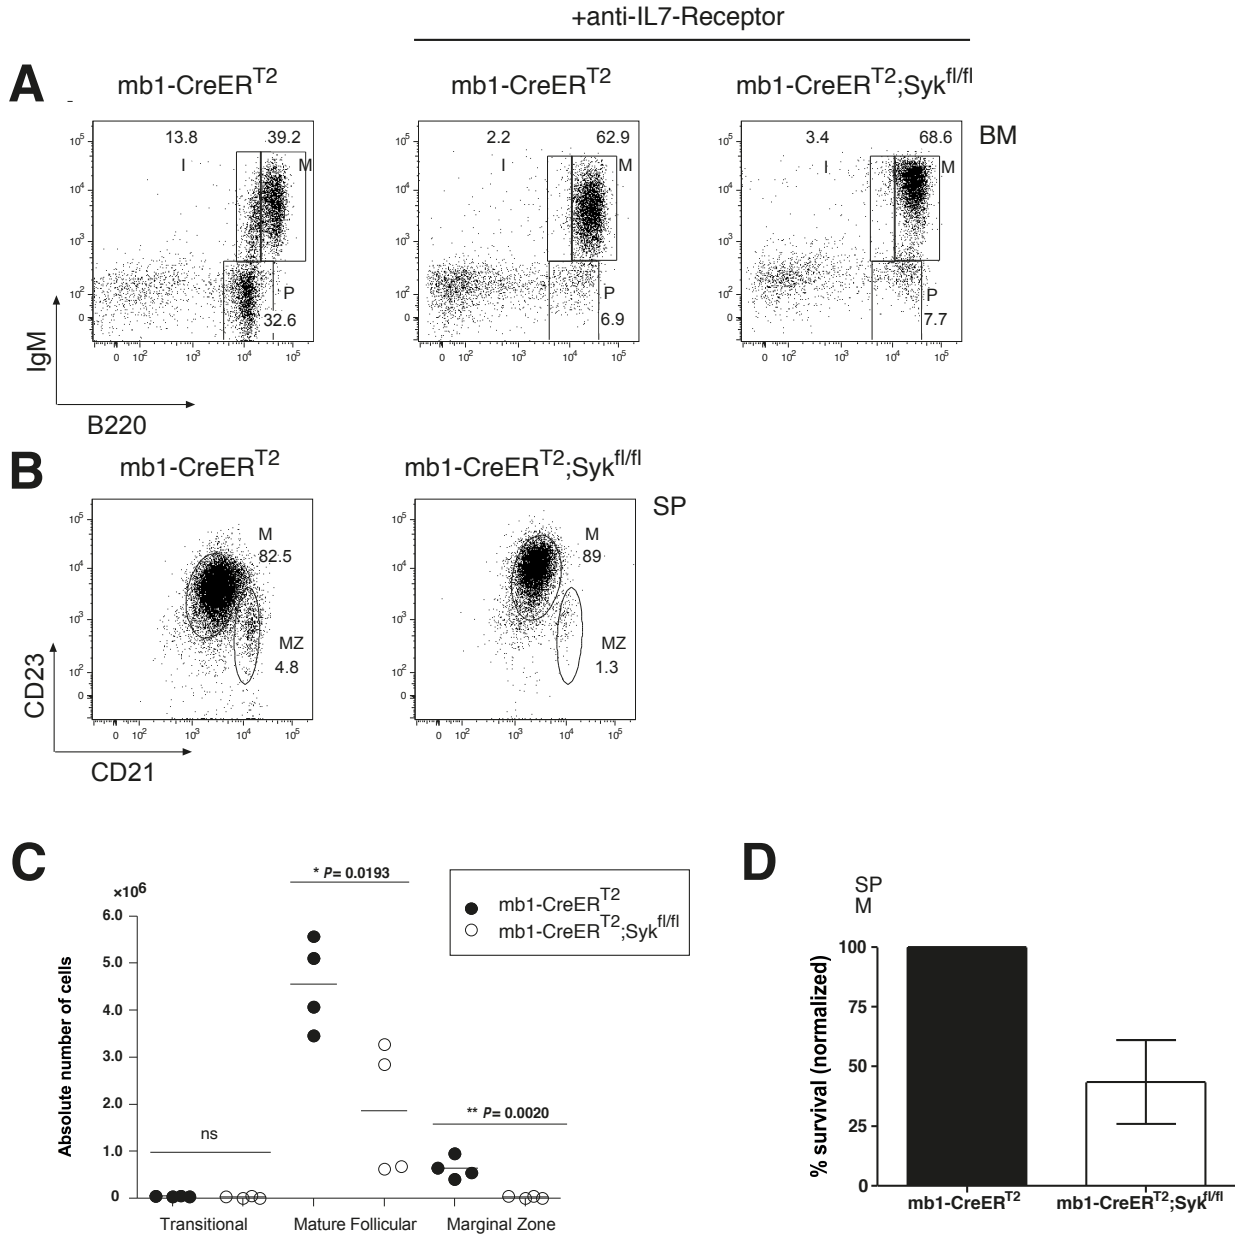

**Figure S8**

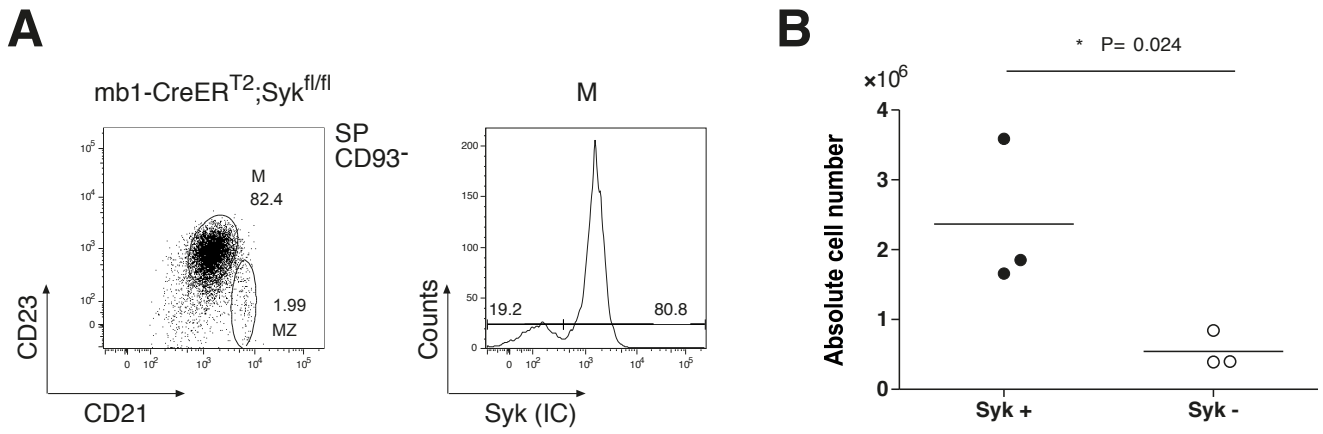



# Figure S9

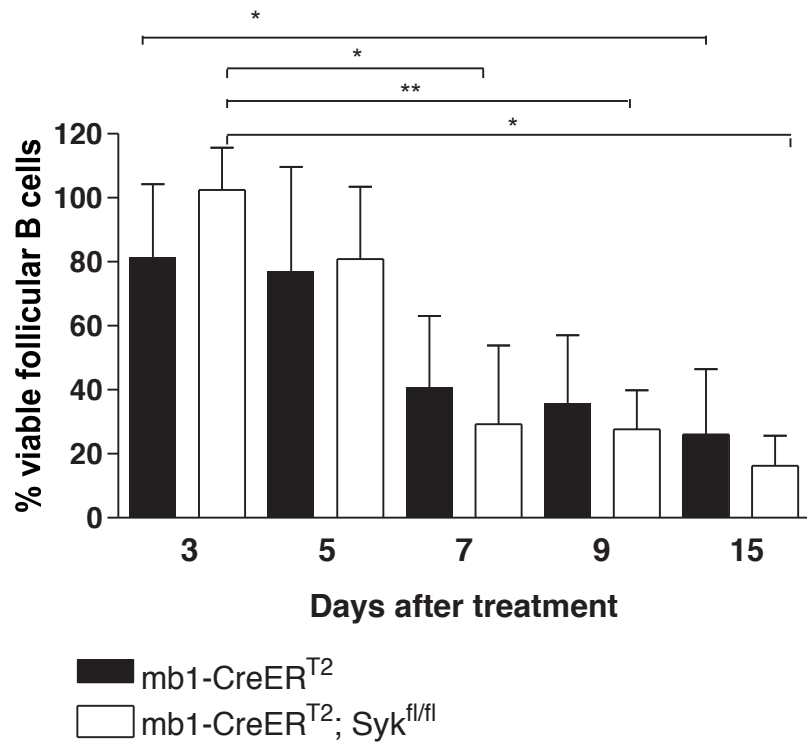

Figure S10

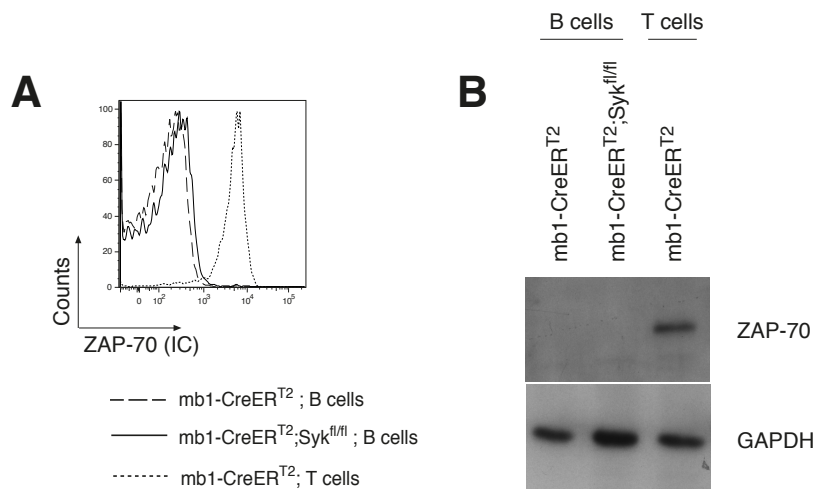

# Figure S11

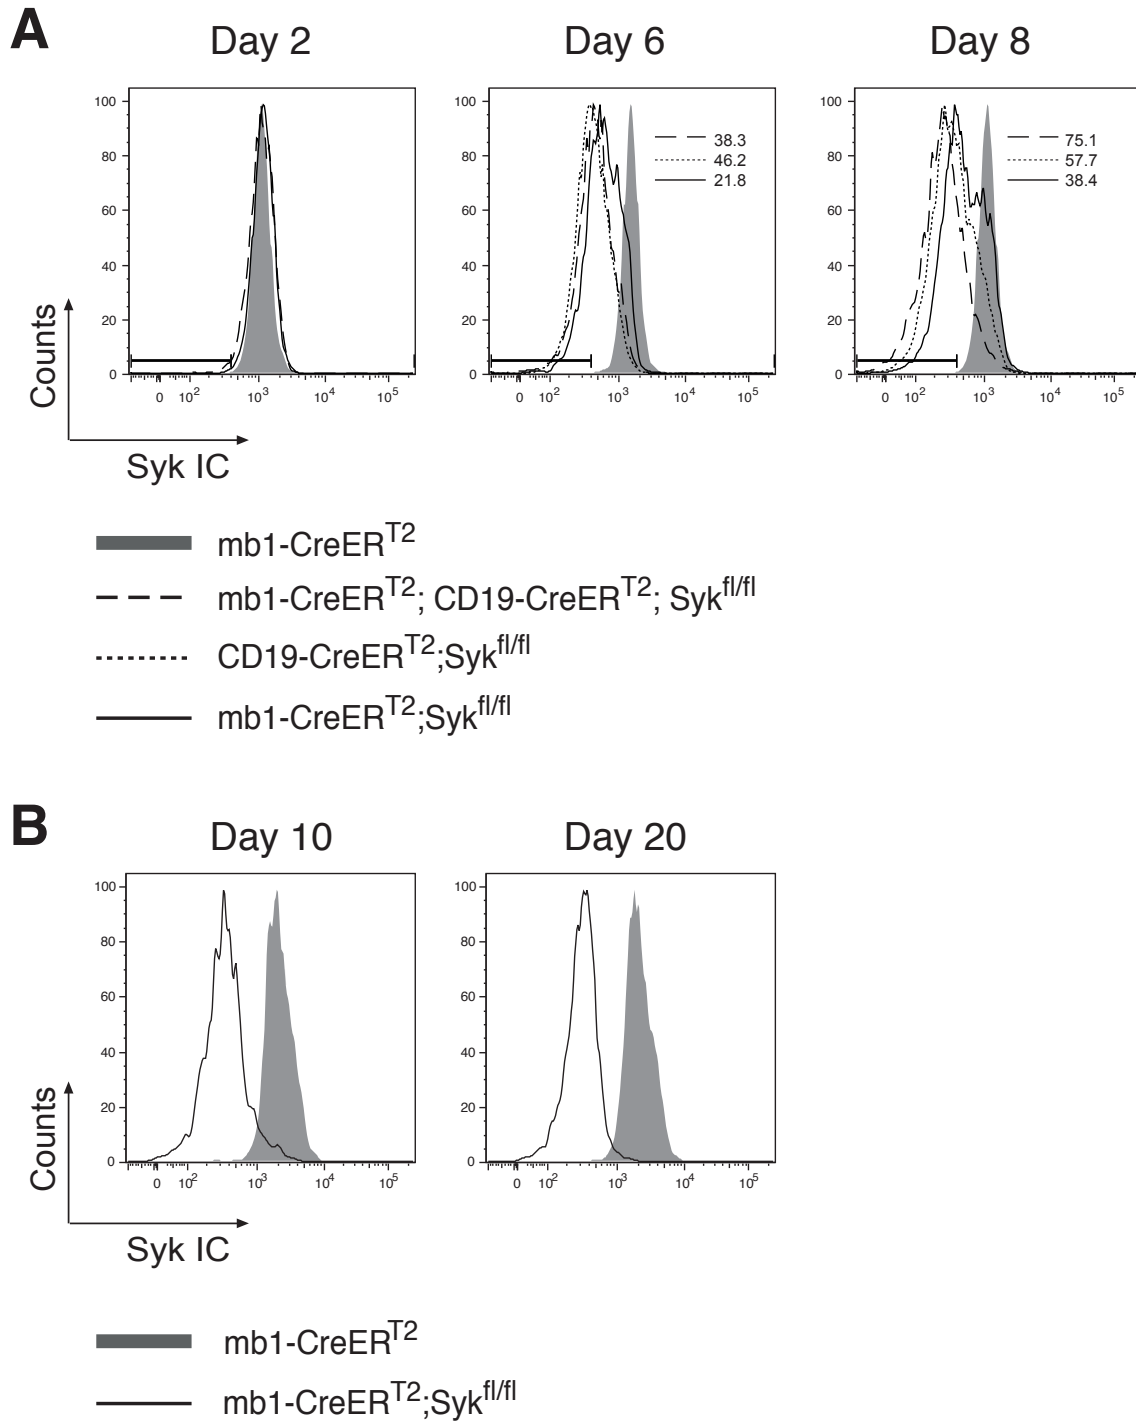

Supplement: embj0034-0925-sd1.pdf [file embj0034-0925-sd1.pdf]
